# Supplementary material for: New idea for treatment strategies for Barcelona Clinic Liver Cancer stages based on a network meta-analysis
Source: PubMed Central journal article supplement (PMC5440153; doi:10.1097/md.0000000000006950), 2017-05-19
Supplement: medi-96-e6950-s001.pdf [file medi-96-e6950-s001.pdf]

A

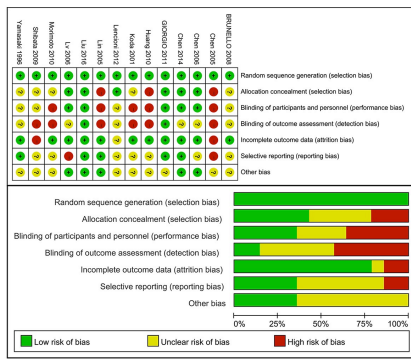

B

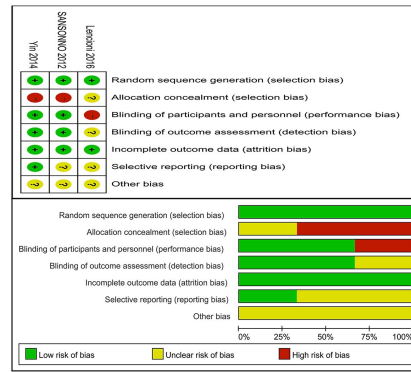

C

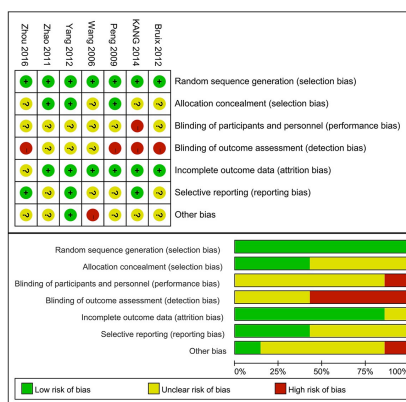

Supplement Table S1. The Network Meta-analysis Results of Therapy Strategies for Each BCLC stage.

| Items                                                                            | Comparisons        |                    |                    |                    |                     |                     |                     |  |
|----------------------------------------------------------------------------------|--------------------|--------------------|--------------------|--------------------|---------------------|---------------------|---------------------|--|
| <b>BCLC Stage A. 1-year overall survival</b>                                     |                    |                    |                    |                    |                     |                     |                     |  |
| PAI                                                                              | 1.02 (0.10, 9.12)  | 0.83 (0.09, 8.58)  | 0.85 (0.02, 37.45) | 1.63 (0.14, 24.54) | 2.76 (0.04, 283.02) | 2.50 (0.11, 118.04) | 2.84 (0.06, 189.09) |  |
| 0.98 (0.11, 10.43)                                                               | PEI                | 0.83 (0.24, 3.92)  | 0.83 (0.03, 22.99) | 1.63 (0.28, 13.99) | 2.79 (0.07, 168.84) | 2.55 (0.18, 74.19)  | 2.83 (0.09, 129.12) |  |
| 1.20 (0.12, 11.25)                                                               | 1.20 (0.25, 4.21)  | RFA                | 0.99 (0.05, 19.34) | 1.95 (0.55, 7.53)  | 3.34 (0.07, 229.48) | 3.08 (0.29, 57.42)  | 3.35 (0.13, 104.56) |  |
| 1.18 (0.03, 46.55)                                                               | 1.20 (0.04, 29.19) | 1.01 (0.05, 18.45) | RFA+125I           | 1.99 (0.09, 50.94) | 3.30 (0.03, 515.41) | 3.13 (0.07, 182.90) | 3.32 (0.05, 300.25) |  |
| 0.61 (0.04, 7.06)                                                                | 0.62 (0.07, 3.58)  | 0.51 (0.13, 1.81)  | 0.50 (0.02, 11.46) | SR                 | 1.69 (0.03, 144.20) | 1.57 (0.16, 23.13)  | 1.74 (0.09, 40.54)  |  |
| 0.36 (0.00, 24.13)                                                               | 0.36 (0.01, 13.78) | 0.30 (0.00, 14.95) | 0.30 (0.00, 37.89) | 0.59 (0.01, 39.21) | TACE+PEI            | 0.96 (0.01, 131.72) | 0.99 (0.00, 194.77) |  |
| 0.40 (0.01, 9.10)                                                                | 0.39 (0.01, 5.54)  | 0.32 (0.02, 3.49)  | 0.32 (0.01, 13.74) | 0.64 (0.04, 6.14)  | 1.04 (0.01, 130.45) | TACE+RFA            | 1.09 (0.02, 48.57)  |  |
| 0.35 (0.01, 18.17)                                                               | 0.35 (0.01, 11.44) | 0.30 (0.01, 7.68)  | 0.30 (0.00, 21.99) | 0.57 (0.02, 11.20) | 1.01 (0.01, 210.93) | 0.92 (0.02, 56.89)  | TACE+SR             |  |
| <b>BCLC Stage A. 3-year overall survival</b>                                     |                    |                    |                    |                    |                     |                     |                     |  |
| PAI                                                                              | 0.94 (0.23, 3.77)  | 1.21 (0.29, 5.08)  | 1.21 (0.09, 16.23) | 2.92 (0.61, 14.98) | 2.11 (0.21, 22.75)  | 1.66 (0.31, 11.28)  | 3.13 (0.33, 33.90)  |  |
| 1.06 (0.27, 4.31)                                                                | PEI                | 1.30 (0.52, 3.19)  | 1.28 (0.11, 14.25) | 3.10 (1.01, 10.29) | 2.23 (0.35, 14.83)  | 1.77 (0.48, 8.23)   | 3.39 (0.44, 28.23)  |  |
| 0.82 (0.20, 3.41)                                                                | 0.77 (0.31, 1.94)  | RFA                | 0.98 (0.10, 9.04)  | 2.41 (1.19, 5.23)  | 1.73 (0.21, 14.32)  | 1.38 (0.52, 4.54)   | 2.59 (0.41, 17.35)  |  |
| 0.82 (0.06, 11.52)                                                               | 0.78 (0.07, 9.12)  | 1.02 (0.11, 9.82)  | RFA+125I           | 2.42 (0.24, 25.79) | 1.74 (0.09, 39.14)  | 1.43 (0.12, 17.97)  | 2.69 (0.14, 50.66)  |  |
| 0.34 (0.07, 1.65)                                                                | 0.32 (0.10, 0.99)  | 0.42 (0.19, 0.84)  | 0.41 (0.04, 4.24)  | SR                 | 0.72 (0.08, 6.62)   | 0.57 (0.20, 1.92)   | 1.08 (0.19, 6.22)   |  |
| 0.47 (0.04, 4.88)                                                                | 0.45 (0.07, 2.87)  | 0.58 (0.07, 4.76)  | 0.57 (0.03, 11.69) | 1.38 (0.15, 12.98) | TACE+PEI            | 0.79 (0.08, 9.00)   | 1.49 (0.09, 24.25)  |  |
| 0.60 (0.09, 3.24)                                                                | 0.57 (0.12, 2.08)  | 0.72 (0.22, 1.92)  | 0.70 (0.06, 8.22)  | 1.76 (0.52, 4.89)  | 1.26 (0.11, 11.95)  | TACE+RFA            | 1.90 (0.23, 14.14)  |  |
| 0.32 (0.03, 3.06)                                                                | 0.29 (0.04, 2.29)  | 0.39 (0.06, 2.41)  | 0.37 (0.02, 6.96)  | 0.93 (0.16, 5.13)  | 0.67 (0.04, 10.55)  | 0.53 (0.07, 4.41)   | TACE+SR             |  |
| <b>BCLC Stage A. 5-year overall survival</b>                                     |                    |                    |                    |                    |                     |                     |                     |  |
| PEI                                                                              | 1.08 (0.31, 3.87)  | 2.14 (0.34, 14.14) | 2.84 (0.46, 16.92) | 1.19 (0.24, 5.77)  | 2.54 (0.26, 21.25)  | 4.15 (0.43, 39.29)  |                     |  |
| 0.92 (0.26, 3.25)                                                                | RFA                | 2.00 (0.51, 7.84)  | 2.61 (0.71, 9.28)  | 1.07 (0.15, 8.71)  | 2.32 (0.36, 13.43)  | 3.82 (0.56, 24.42)  |                     |  |
| 0.47 (0.07, 2.92)                                                                | 0.50 (0.13, 1.97)  | RFA+125I           | 1.31 (0.18, 8.62)  | 0.55 (0.04, 6.51)  | 1.15 (0.11, 11.18)  | 1.90 (0.17, 20.22)  |                     |  |
| 0.35 (0.06, 2.17)                                                                | 0.38 (0.11, 1.42)  | 0.77 (0.12, 5.48)  | SR                 | 0.42 (0.04, 4.71)  | 0.88 (0.25, 3.12)   | 1.48 (0.36, 5.82)   |                     |  |
| 0.84 (0.17, 4.10)                                                                | 0.93 (0.11, 6.86)  | 1.82 (0.15, 22.27) | 2.39 (0.21, 28.36) | TACE+PEI           | 2.15 (0.13, 33.49)  | 3.58 (0.22, 58.18)  |                     |  |
| 0.39 (0.05, 3.85)                                                                | 0.43 (0.07, 2.82)  | 0.87 (0.09, 9.16)  | 1.14 (0.32, 4.02)  | 0.47 (0.03, 7.66)  | TACE+RFA            | 1.66 (0.25, 11.37)  |                     |  |
| 0.24 (0.03, 2.35)                                                                | 0.26 (0.04, 1.80)  | 0.53 (0.05, 5.92)  | 0.67 (0.17, 2.80)  | 0.28 (0.02, 4.59)  | 0.60 (0.09, 4.02)   | TACE+SR             |                     |  |
| <b>BCLC Stage B. 1-year overall survival</b>                                     |                    |                    |                    |                    |                     |                     |                     |  |
| SR                                                                               | 0.32 (0.02, 6.15)  | 0.92 (0.03, 49.27) |                    |                    |                     |                     |                     |  |
| 3.15 (0.16, 65.41)                                                               | TACE               | 2.97 (0.40, 40.00) |                    |                    |                     |                     |                     |  |
| 1.09 (0.02, 35.81)                                                               | 0.34 (0.03, 2.53)  | TACE+Sorafenib     |                    |                    |                     |                     |                     |  |
| <b>BCLC Stage B. 3-year overall survival</b>                                     |                    |                    |                    |                    |                     |                     |                     |  |
| SR                                                                               | 0.18 (0.02, 1.53)  |                    |                    |                    |                     |                     |                     |  |
| 5.55 (0.65, 49.58)                                                               | TACE               |                    |                    |                    |                     |                     |                     |  |
| <b>BCLC Stage C. 1-year overall survival (Sorafenib vs. SC vs. Sorafenib+CR)</b> |                    |                    |                    |                    |                     |                     |                     |  |
| SC                                                                               | 1.81 (0.47, 6.84)  | 5.73 (0.69, 45.35) |                    |                    |                     |                     |                     |  |
| 0.55 (0.15, 2.15)                                                                | Sorafenib          | 3.11 (0.67, 15.36) |                    |                    |                     |                     |                     |  |
| 0.17 (0.02, 1.45)                                                                | 0.32 (0.07, 1.49)  | Sorafenib+CR       |                    |                    |                     |                     |                     |  |
| <b>BCLC Stage C. 1-year overall survival (SR+TACE vs. SR vs. SR+TACE+PVC)</b>    |                    |                    |                    |                    |                     |                     |                     |  |
| SR                                                                               | 1.86 (0.72, 5.05)  | 3.12 (0.84, 12.32) |                    |                    |                     |                     |                     |  |
| 0.54 (0.20, 1.39)                                                                | SR+TACE            | 1.68 (0.43, 6.70)  |                    |                    |                     |                     |                     |  |
| 0.32 (0.08, 1.19)                                                                | 0.59 (0.15, 2.34)  | SR+TACE+PVC        |                    |                    |                     |                     |                     |  |
| <b>BCLC Stage C. 1-year overall survival (TACE+RFA vs. TACE vs. TACE+Rg3)</b>    |                    |                    |                    |                    |                     |                     |                     |  |
| TACE                                                                             | 4.06 (0.58, 29.00) | 2.19 (0.40, 12.60) |                    |                    |                     |                     |                     |  |

|                   |                    |                   |
|-------------------|--------------------|-------------------|
| 0.25 (0.03, 1.72) | TACE+RFA           | 0.55 (0.04, 6.95) |
| 0.46 (0.08, 2.50) | 1.82 (0.14, 24.57) | TACE+GRg3         |

---

**Supplement Table S2. Results of Node-splitting Models for the Test of Difference Between Direct and Indirect Effect in the Analysis of Primary Outcomes.**

| Items                                        | Comparison               | Direct Effect       | Indirect Effect     | Overall             | <i>P</i> value |
|----------------------------------------------|--------------------------|---------------------|---------------------|---------------------|----------------|
| <b>BCLC Stage A. 1-year overall survival</b> |                          |                     |                     |                     |                |
|                                              | <b>RFA, SR</b>           | 0.49 (-0.84, 1.80)  | 17.61 (1.44, 61.34) | 0.68 (-0.59, 2.02)  | 0.16           |
|                                              | <b>RFA,<br/>TACE+RFA</b> | 22.49 (1.76, 56.91) | 0.19 (-2.99, 3.31)  | 1.13 (-1.25, 4.05)  | 0.16           |
|                                              | <b>SR, TACE+RFA</b>      | -0.34 (-3.26, 2.41) | 19.06 (1.08, 90.92) | 0.45 (-1.81, 3.14)  | 0.11           |
| <b>BCLC Stage A. 3-year overall survival</b> |                          |                     |                     |                     |                |
|                                              | <b>RFA, SR</b>           | 0.83 (-0.00, 1.71)  | 1.28 (-0.77, 3.59)  | 0.88 (0.18, 1.65)   | 0.65           |
|                                              | <b>RFA,<br/>TACE+RFA</b> | 0.54 (-0.84, 2.11)  | 0.06 (-1.82, 2.02)  | 0.32 (-0.65, 1.51)  | 0.64           |
|                                              | <b>SR, TACE+RFA</b>      | -0.76 (-2.42, 0.98) | -0.31 (-1.92, 1.54) | -0.56 (-1.59, 0.65) | 0.65           |
